# Supplementary material
Source: PubMed Central journal article supplement (PMC3838266)
Supplement: JVI.02742-13_zjv999098388so1.pdf [file JVI.02742-13_zjv999098388so1.pdf]

**Movie S1.** The movie displays a series of tomographic slices capturing the interaction between SIRV2 and the tip of the *S. islandicus* LAL14/1 filament. Green arrows, LAL14/1 filament; red arrows, SIRV2 virion; blue circle, attachment site. The movie is related to Fig 2B.
